# Supplementary material for: In Situ Pinpoint Photopolymerization of Phos-Tag Polyacrylamide Gel in Poly(dimethylsiloxane)/Glass Microchip for Specific Entrapment, Derivatization, and Separation of Phosphorylated Compounds
Source: MDPI journal article supplement (doi:10.3390/gels7040268), 2021-12-16
Supplement: s1 [file s1]

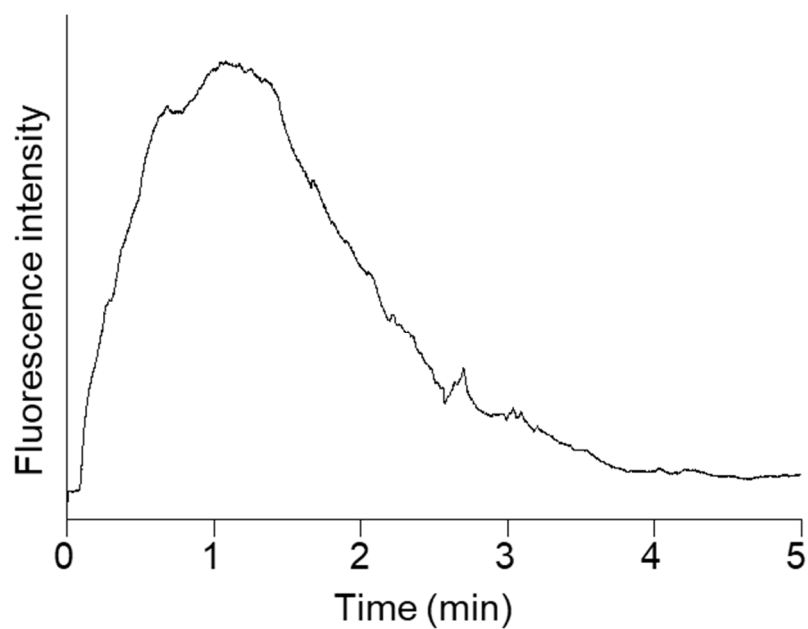

**Figure S1.** Time course of the changes in the fluorescence intensity due to introduction of  $10^{-6}$  M DTAF at the Phos-tag acrylamide gel.

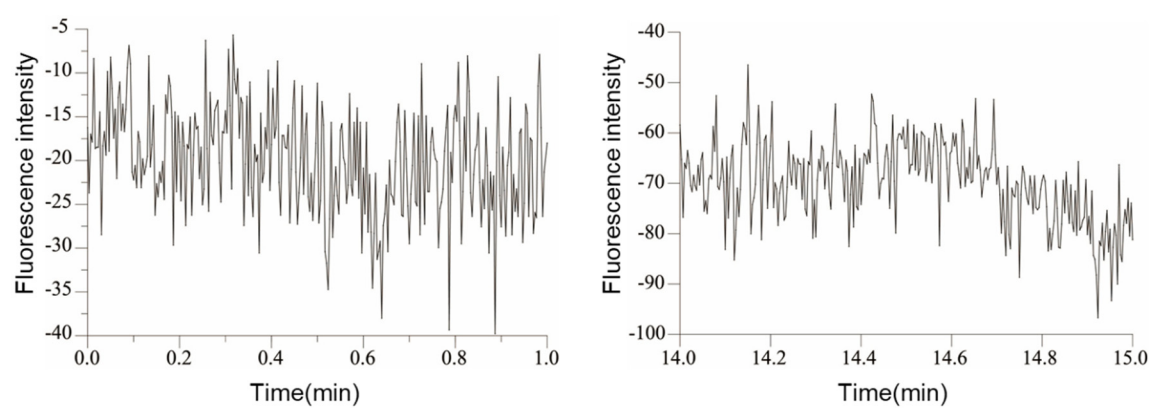

**Figure S2.** Time course of fluorescence intensity from 1 minute before the start of measurement and 1 minute before the end of measurement.

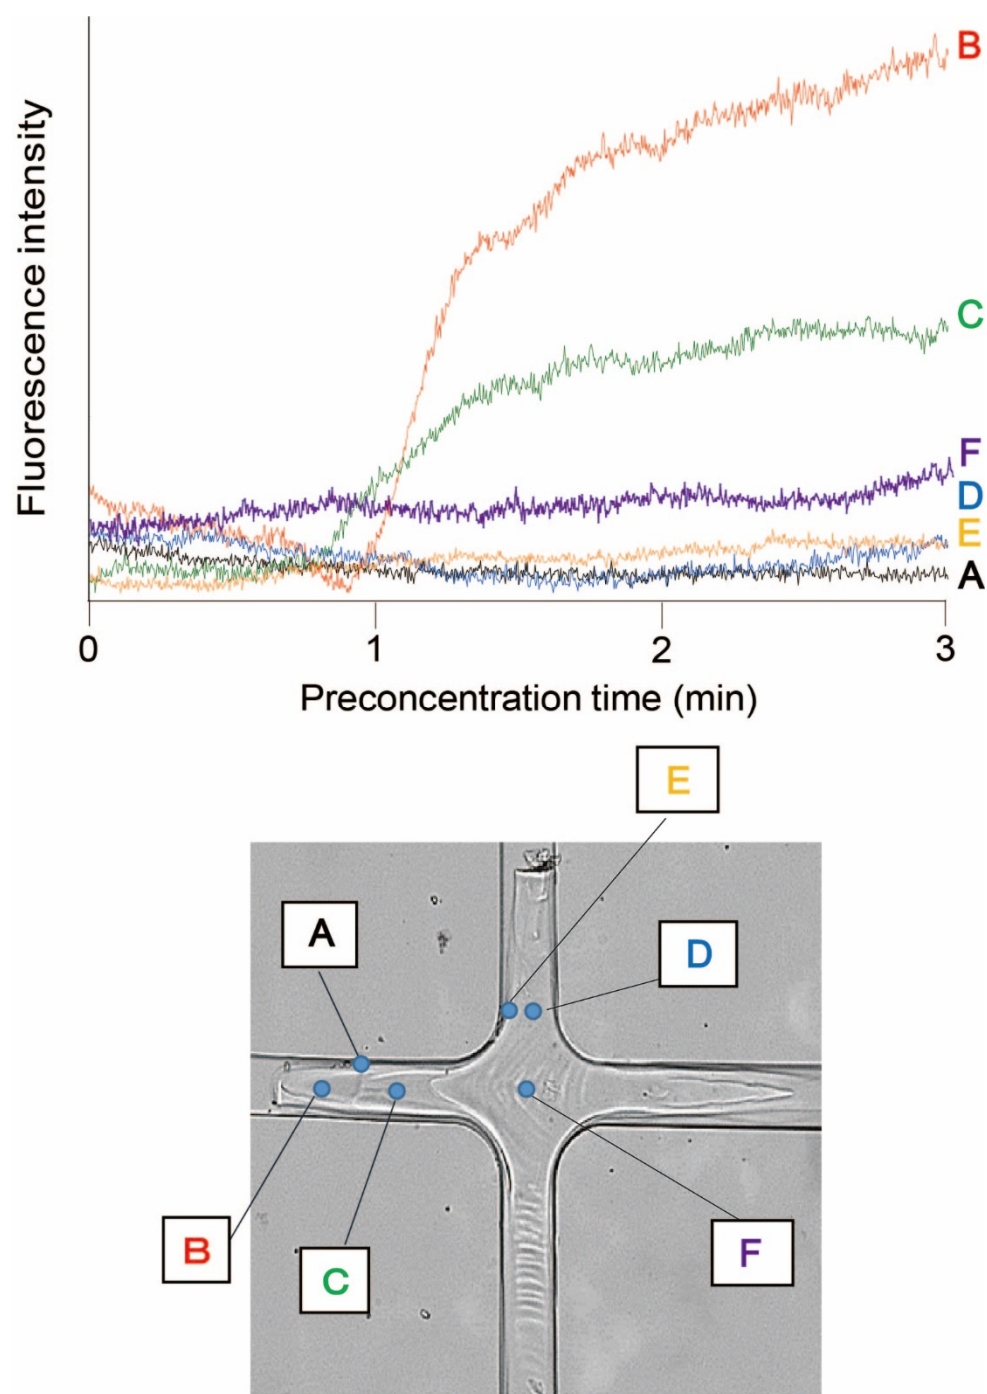

**Figure S3.** Time course of the changes in the fluorescence intensity due to concentration of the DTAF-labeled monophosphorylated  $\beta$ -casein at the various pin-point in the Phos-tag acrylamide gel. A-F shown in the figure below measures the fluorescence intensity of the corresponding part of the gel.
